# Supplementary material for: Preparation and Characterization of Chitosan-Alginate Microspheres Loaded with Quercetin
Source: MDPI journal article supplement (doi:10.3390/polym14030490), 2022-01-26
Supplement: s1 [file s1]

## Article

# Preparation and Characterization of Chitosan-Alginate Microspheres Loaded with Quercetin

Frenț Olimpia Daniela <sup>1</sup>, Duteanu Narcis <sup>2,\*</sup>, Teusdea Alin Cristian <sup>3,\*</sup>, Ciocan Stefania <sup>2,\*</sup>, Vicaș Laura <sup>4,\*</sup>, Jurca Tunde <sup>4</sup>, Muresan Mariana <sup>5,†</sup>, Pallag Annamaria <sup>4</sup>, Ianasi Paula <sup>6,†</sup> and Marian Eleonora <sup>4,†</sup>

<sup>1</sup> Doctoral School of Biomedical Science, University of Oradea, 1 University Street, 410087 Oradea, Romania; daniela.olimpia@yahoo.com

<sup>2</sup> Faculty of Industrial Chemistry and Environmental Engineering, Politehnica University of Timisoara, 2 Piata Victoriei, 300006 Timisoara, Romania

<sup>3</sup> Faculty of Environmental Protection, University of Oradea, 26th Gen. Magheru Avenue, 410087 Oradea, Romania

<sup>4</sup> Department of Pharmacy, Faculty of Medicine and Pharmacy, University of Oradea, 29 Nicolae Jiga Street, 410028 Oradea, Romania; jurcatunde@yahoo.com (J.T.); annamariapallag@gmail.com (P.A.); marian\_eleonora@yahoo.com (M.E.)

<sup>5</sup> Department of Preclinical Discipline, Faculty of Medicine and Pharmacy, University of Oradea, 10, 1th December Square, 410068 Oradea, Romania; marianamur2002@yahoo.com

<sup>6</sup> INCEMC-National Institute for Research and Development in Electrochemistry and Condensed Matter—Timisoara, No.144 Dr. A. Paunescu Podeanu Street, 300569 Timisoara, Romania; paulasvera@gmail.com

\* Correspondence: narcis.duteanu@upt.ro (D.N.); ateusdea@yahoo.co.uk (T.A.C.); ciocanstefania10@gmail.com (C.S.); laura.vicas@gmail.com (V.L.)

† These authors contributed equally to this work.

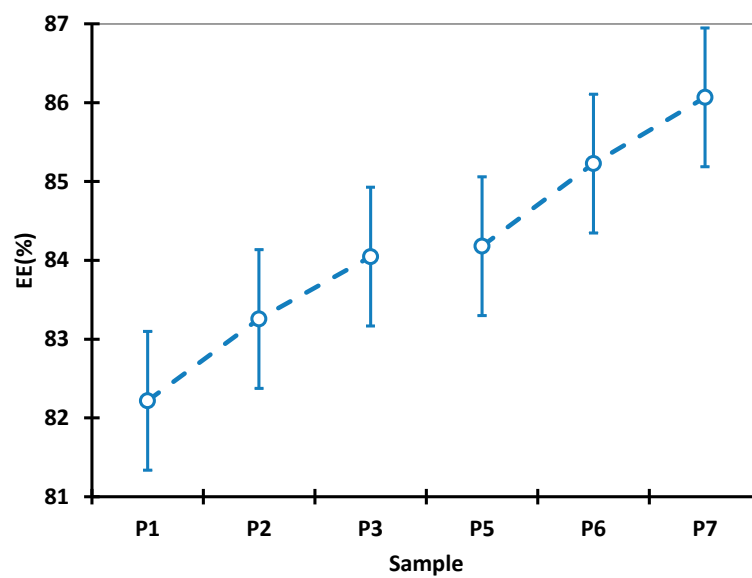

**Supplementary Figure S1.** Interval plots of the microspheres' entrapment efficiency (EE(%)) for sample factor levels

**Supplementary Table S1.** Percentage of swelling index (idxSWL (%)) from microspheres  
The results belong to the Time factor levels

| Time | idxSWL (%)          |
|------|---------------------|
| 1h   | 1797.265h ±1550.706 |
| 2h   | 3603.814g ±2826.160 |
| 3h   | 5063.423f ±3736.602 |
| 4h   | 6165.873e ±4319.882 |
| 5h   | 6922.697d ±4663.962 |
| 6h   | 7470.614c ±4892.880 |
| 7h   | 7790.508b ±5021.012 |
| 8h   | 7941.329a ±5082.533 |

Note: Different letters that follow the means prescribe statistically significant means. Results were calculated with post-hoc Duncan ( $P = 0.05$ ) multiple comparisons test, within the two-way ANOVA test ( $P = 0.05$ ).

**Supplementary Table S2.** Percentage of swelling index (idxSWL (%)) from microspheres  
The results belong to the Sample\*pH interaction factor levels

| pH         | P1                      | P2                      | P3                      | P4                      | P5                      | P6                      | P7                      | P8                      |
|------------|-------------------------|-------------------------|-------------------------|-------------------------|-------------------------|-------------------------|-------------------------|-------------------------|
| <b>1.2</b> | 1473.425ah<br>±538.853  | 1427.960ai<br>±539.484  | 1404.273aj<br>±542.794  | 1528.835ag<br>±564.444  | 1307.667al<br>±496.099  | 1130.668am<br>±402.629  | 979.569an<br>±343.418   | 1365.924ak<br>±528.571  |
| <b>3</b>   | 2275.329z<br>±881.996   | 2218.219aa<br>±843.629  | 2112.933ab<br>±794.380  | 2401.298y<br>±882.953   | 1783.587ad<br>±800.941  | 1745.538ae<br>±788.417  | 1690.836af<br>±778.962  | 1935.494ac<br>±841.999  |
| <b>5</b>   | 6113.748r<br>±2723.801  | 5847.415s<br>±2622.650  | 5435.710t<br>±2514.804  | 6561.800q<br>±2730.620  | 4945.600v<br>±2379.324  | 4701.554w<br>±2306.529  | 4312.221x<br>±2065.922  | 5087.868u<br>±2456.338  |
| <b>6.8</b> | 10074.148j<br>±2983.065 | 9590.240k<br>±3099.716  | 8993.680l<br>±2941.007  | 10548.054g<br>±3193.720 | 8401.038n<br>±2888.310  | 8052.005o<br>±2917.265  | 7544.502p<br>±2795.821  | 8672.039m<br>±2982.315  |
| <b>7.4</b> | 12730.665b<br>±3802.067 | 12091.470c<br>±3822.017 | 11447.610d<br>±3564.082 | 13154.598a<br>±3894.450 | 10855.442f<br>±3475.770 | 10481.360h<br>±3318.026 | 10291.154i<br>±3382.006 | 11062.138e<br>±3486.226 |

Note: Different letters that follow the means prescribe statistically significant means. Results were calculated with *post-hoc* Duncan (P = 0.05) multiple comparisons test, within the two-way ANOVA test (P = 0.05).

**Supplementary Table S3. Percentage of swelling index (idxSWL (%)) from microspheres**

The results belong to the Sample\*Time interaction factor levels

| Time (h) | P1                      | P2                       | P3                      | P4                      | P5                      | P6                      | P7                      | P8                      |
|----------|-------------------------|--------------------------|-------------------------|-------------------------|-------------------------|-------------------------|-------------------------|-------------------------|
| 1        | 2111.586bb<br>±1708.746 | 1977.970bc<br>±1648.481  | 1863.390bd<br>±1570.016 | 2173.230ba<br>±1740.397 | 1636.347bf<br>±1415.783 | 1533.027bg<br>±1355.169 | 1390.005bh<br>±1252.721 | 1692.562be<br>±1465.031 |
| 2        | 4314.516as<br>±3284.754 | 3809.003au<br>±2761.908  | 3576.851av<br>±2638.858 | 4588.448aq<br>±3402.536 | 3218.112ax<br>±2506.902 | 3089.102ay<br>±2459.149 | 2858.531az<br>±2297.026 | 3375.949aw<br>±2606.158 |
| 3        | 5847.523ai<br>±4227.424 | 5419.997al<br>±3776.339  | 5071.436an<br>±3551.664 | 6180.719ag<br>±4299.870 | 4646.097ap<br>±3450.504 | 4349.597ar<br>±3266.790 | 4211.661at<br>±3227.409 | 4780.357ao<br>±3462.475 |
| 4        | 6876.459y<br>±4674.870  | 6611.087ab<br>±4437.5961 | 6259.761ae<br>±4227.238 | 7348.459r<br>±4879.085  | 5716.531aj<br>±4009.670 | 5443.489ak<br>±3892.903 | 5218.928am<br>±3817.495 | 5852.271ai<br>±4053.975 |
| 5        | 7680.065m<br>±5036.429  | 7400.024q<br>±4833.197   | 6975.384w<br>±4538.154  | 8097.092h<br>±5232.432  | 6458.980ac<br>±4331.477 | 6204.656af<br>±4222.779 | 5935.447ah<br>±4170.873 | 6629.931aa<br>±4399.728 |
| 6        | 8261.844g<br>±5295.406  | 8019.329i<br>±5159.513   | 7485.099p<br>±4768.962  | 8541.580d<br>±5423.352  | 7040.053v<br>±4540.720  | 6771.981z<br>±4448.116  | 6440.157ad<br>±4374.256 | 7204.868t<br>±4613.712  |
| 7        | 8534.763e<br>±5368.766  | 8265.205g<br>±5224.243   | 7787.080<br>±4876.678   | 8824.191b<br>±5550.553  | 7402.509q<br>±4742.855  | 7123.249u<br>±4614.031  | 6766.793z<br>±4533.979  | 7620.270n<br>±4807.913  |
| 8        | 8640.945c<br>±5406.801  | 8377.873f<br>±5256.6826  | 8011.727j<br>±4971.906  | 8957.618a<br>±5649.230  | 7550.705o<br>±4800.800  | 7262.703s<br>±4678.650  | 6887.728x<br>±4609.238  | 7841.332k<br>±4850.132  |

Note: Different letters that follow the means prescribe statistically significant means. Results were calculated with *post-hoc* Duncan (P = 0.05) multiple comparisons test, within the two-way ANOVA test (P = 0.05).

**Supplementary Table S4. Percentage of swelling index (idxSWL (%)) from microspheres**

The results belong to the Sample factor levels

| Sample | idxSWL (%)          |
|--------|---------------------|
| P1     | 6533.463b ±5033.793 |
| P2     | 6235.061c ±4838.292 |
| P3     | 5878.841d ±4554.464 |
| P4     | 6838.917a ±5206.396 |
| P5     | 5458.667f ±4376.188 |
| P6     | 5222.225g ±4251.799 |
| P7     | 4963.656h ±4154.492 |
| P8     | 5624.693e ±4448.765 |

Note: Different letters that follow the means prescribe statistically significant means. Results were calculated with *post-hoc* Duncan (P = 0.05) multiple comparisons test, within the two-way ANOVA test (P = 0.05)

**Supplementary Table S5. Percentage of swelling index (idxSWL (%)) from microspheres**

The results belong to the P1\*pH\*Time interaction factor levels

| Time (h) | P1_pH1.2             | P1_pH3                  | P1_pH5               | P1_pH6.8              | P1_pH7.4              |
|----------|----------------------|-------------------------|----------------------|-----------------------|-----------------------|
| 1        | 456.777ic<br>±0.424  | 645.287hw hx<br>±0.525  | 1198.023he<br>±0.469 | 3521.980eq<br>±1.367  | 4735.863ec<br>±0.719  |
| 2        | 856.900hp<br>±0.699  | 1323.027ha<br>±0.555    | 2997.160fb<br>±0.497 | 7442.653cv<br>±95.926 | 8952.840ca<br>±0.537  |
| 3        | 1246.487hd<br>±0.755 | 1832.407gj<br>±0.390    | 4679.867ee<br>±4.621 | 9547.803br<br>±0.600  | 11931.053ap<br>±2.901 |
| 4        | 1547.333gt<br>±0.396 | 2292.380fu fv<br>±0.933 | 6209.833dm<br>±1.601 | 10853.383bd<br>±0.978 | 13479.363uv<br>±0.882 |
| 5        | 1741.553go<br>±0.681 | 2676.103fj<br>±0.792    | 7480.103cu<br>±1.104 | 11767.100aq<br>±0.940 | 14735.467l<br>±0.685  |
| 6        | 1894.560gh<br>±0.479 | 2998.780fb<br>±0.455    | 8430.207cg<br>±1.576 | 12225.417al<br>±1.046 | 15760.257g<br>±1.038  |
| 7        | 1995.650ge<br>±0.540 | 3175.783ew<br>±0.568    | 8910.327cb<br>±1.129 | 12547.567af<br>±1.489 | 16044.487d<br>±1.790  |
| 8        | 2048.137gb<br>±0.830 | 3258.867eu ±<br>27.955  | 9004.460bz<br>±1.263 | 12687.277ad<br>±1.079 | 16205.987c<br>±1.913  |

Note: Different group letters that follow the means prescribe statistically significant means. Results were calculated with *post-hoc* Duncan (P = 0.05) multiple comparisons test, within the two-way ANOVA test (P = 0.05).

**Supplementary Table S6. Percentage of swelling index (idxSWL (%)) from microspheres**

The results belong to the P2\*pH\*Time interaction factor levels

| Time (h) | P2_pH1.2             | P2_pH3                  | P2_pH5               | P2_pH6.8                 | P2_pH7.4              |
|----------|----------------------|-------------------------|----------------------|--------------------------|-----------------------|
| 1        | 435.303id<br>±1.211  | 631.933hx hy<br>±0.875  | 978.100hl<br>±0.829  | 3275.893et<br>±1.271     | 4568.620ef<br>±1.081  |
| 2        | 806.050hq<br>±1.315  | 1302.777hb<br>±0.964    | 2896.567fd<br>±1.162 | 6185.953dn<br>±1.099     | 7853.670co<br>±2.227  |
| 3        | 1175.643hf<br>±1.505 | 1826.553gj gk<br>±0.741 | 4575.710ef<br>±0.962 | 8767.513cc<br>±1.081     | 10754.563be<br>±1.496 |
| 4        | 1480.757gw<br>±0.919 | 2272.223fw<br>±1.038    | 6054.140dp<br>±0.868 | 10452.983bh<br>±1.727    | 12795.333ac<br>±1.001 |
| 5        | 1684.350gp<br>±0.671 | 2621.343fl<br>±0.942    | 7174.140cz<br>±1.148 | 11385.107av aw<br>±1.911 | 14135.180q<br>±1.288  |
| 6        | 1854.713gi<br>±1.044 | 2871.620fe<br>±1.327    | 8066.483cl<br>±1.060 | 12047.663an<br>±1.161    | 15256.163i<br>±1.656  |
| 7        | 1958.990gg<br>±0.703 | 3063.430fa<br>±0.516    | 8447.027cf<br>±0.940 | 12275.613ak<br>±1.806    | 15580.963h<br>±2.100  |
| 8        | 2027.873gd<br>±0.753 | 3155.870ex<br>±1.506    | 8587.157ce<br>±1.076 | 12331.197aj<br>±2.122    | 15787.267f<br>±2.295  |

Note: Different group letters that follow the means prescribe statistically significant means. Results were calculated with *post-hoc* Duncan (P = 0.05) multiple comparisons test, within the two-way ANOVA test (P = 0.05).



**Supplementary Table S7. Percentage of swelling index (idxSWL (%)) from microspheres**

The results belong to the P3\*pH\*Time interaction factor levels

| Time (h) | P3_pH1.2                | P3_pH3               | P3_pH5               | P3_pH6.8              | P3_pH7.4              |
|----------|-------------------------|----------------------|----------------------|-----------------------|-----------------------|
| 1        | 416.917ie<br>±0.601     | 613.850hz<br>±0.205  | 857.050hp<br>±0.764  | 3080.260ez<br>±0.821  | 4348.873ei<br>±1.137  |
| 2        | 784.763hr<br>±1.123     | 1248.227hd<br>±0.831 | 2485.083fp<br>±0.784 | 5938.040dr<br>±0.772  | 7428.143cw<br>±0.797  |
| 3        | 1128.477hg<br>±0.838    | 1786.767gn<br>±0.487 | 4155.423ej<br>±1.086 | 7973.410cn<br>±1.045  | 10313.103bj<br>±1.591 |
| 4        | 1448.620gx<br>±47.773   | 2153.520fy<br>±0.694 | 5711.593dt<br>±1.114 | 9536.800br<br>±1.300  | 12448.270ag<br>±0.928 |
| 5        | 1667.210gq<br>±1.271    | 2467.757fq<br>±0.619 | 6784.837df<br>±1.317 | 10498.870bg<br>±1.250 | 13458.247w<br>±0.776  |
| 6        | 1815.150gk gl<br>±1.066 | 2693.327fi<br>±0.876 | 7514.070cs<br>±1.150 | 11255.170ay<br>±1.539 | 14147.780q<br>±1.590  |
| 7        | 1954.657gg<br>±0.646    | 2888.133fd<br>±0.792 | 7862.407co<br>±0.996 | 11681.263ar<br>±2.068 | 14548.940n<br>±2.765  |
| 8        | 2018.393gd<br>±0.681    | 3051.880fa<br>±1.283 | 8115.217cj<br>±1.055 | 11985.623ao<br>±2.127 | 14887.520k<br>±1.954  |

Note: Different group letters that follow the means prescribe statistically significant means. Results were calculated with *post-hoc* Duncan (P = 0.05) multiple comparisons test, within the two-way ANOVA test (P = 0.05).

**Supplementary Table S8. Percentage of swelling index (idxSWL (%)) from microspheres**

The results belong to the P4\*pH\*Time interaction factor levels

| Time (h) | P4_pH1.2                | P4_pH3               | P4_pH5               | P4_pH6.8              | P4_pH7.4              |
|----------|-------------------------|----------------------|----------------------|-----------------------|-----------------------|
| 1        | 474.700ib<br>±0.403     | 696.883hu<br>±0.590  | 1201.290he<br>±0.610 | 3728.180en<br>±0.885  | 4765.097eb<br>±0.872  |
| 2        | 874.710ho<br>±0.764     | 1448.537gx<br>±0.389 | 3554.980ep<br>±0.700 | 7516.130cs<br>±0.787  | 9547.883br<br>±0.576  |
| 3        | 1288.293hb hc<br>±0.320 | 2043.430gc<br>±0.767 | 5459.497du<br>±0.496 | 9765.663bp<br>±0.534  | 12346.710ai<br>±0.830 |
| 4        | 1603.033gr<br>±0.338    | 2491.790fp<br>±0.707 | 7129.957db<br>±1.318 | 11373.147aw<br>±0.974 | 14144.367q<br>±0.951  |
| 5        | 1803.737gl gm<br>±0.558 | 2822.287ff<br>±0.935 | 8215.717ci<br>±0.863 | 12425.110ah<br>±1.096 | 15218.610j<br>±0.897  |
| 6        | 1956.170gg<br>±0.328    | 3116.957ey<br>±0.728 | 8742.110cd<br>±1.524 | 12946.800aa<br>±0.765 | 15945.863e<br>±0.662  |
| 7        | 2093.567ga<br>±0.696    | 3288.410et<br>±0.380 | 9029.650by<br>±1.934 | 13223.477z<br>±1.492  | 16485.853b<br>±1.527  |
| 8        | 2136.473fz<br>±0.488    | 3302.093es<br>±0.926 | 9161.203bv<br>±1.979 | 13405.923x<br>±1.846  | 16782.397a<br>±0.716  |

Note: Different group letters that follow the means prescribe statistically significant means. Results were calculated with *post-hoc* Duncan (P = 0.05) multiple comparisons test, within the two-way ANOVA test (P = 0.05).

**Supplementary Table S9. Percentage of swelling index (idxSWL (%)) from microspheres**

The results belong to the P5\*pH\*Time interaction factor levels

| Time (h) | P5_pH1.2                | P5_pH3                  | P5_pH5               | P5_pH6.8                | P5_pH7.4              |
|----------|-------------------------|-------------------------|----------------------|-------------------------|-----------------------|
| 1        | 384.983if<br>±0.418     | 445.157ic id<br>±0.289  | 784.587hr<br>±0.283  | 2618.067fl fm<br>±0.570 | 3948.940el<br>±0.255  |
| 2        | 732.370ht<br>±0.835     | 894.810hn<br>±0.485     | 2178.903fx<br>±0.406 | 5229.780dx<br>±0.584    | 7054.697dc<br>±0.230  |
| 3        | 1078.823hi<br>±0.776    | 1288.540hb hc<br>±0.721 | 3591.763eo<br>±0.565 | 7498.550ct<br>±0.687    | 9772.807bp<br>±0.525  |
| 4        | 1365.343gy gz<br>±0.658 | 1684.603gp<br>±0.278    | 4959.020dz<br>±0.428 | 9093.400bw<br>±1.003    | 11480.290au<br>±0.964 |
| 5        | 1572.137gs<br>±0.593    | 2060.910gb<br>±0.632    | 6056.623dp<br>±0.701 | 9979.607bm<br>±0.752    | 12625.623ae<br>±0.836 |
| 6        | 1729.663go<br>±1.223    | 2451.150fr<br>±1.549    | 6992.553de<br>±0.429 | 10536.827bf<br>±0.752   | 13490.070u<br>±0.9070 |
| 7        | 1794.250gm gn<br>±0.478 | 2641.250fk<br>±0.446    | 7443.593cv<br>±1.513 | 10983.810ba<br>±2.091   | 14149.643q<br>±1.351  |
| 8        | 1803.763gl gm<br>±0.435 | 2802.273fg<br>±0.835    | 7557.760cr<br>±2.066 | 11268.263ay<br>±1.857   | 14321.463p<br>±0.341  |

Note: Different group letters that follow the means prescribe statistically significant means. Results were calculated with *post-hoc* Duncan (P = 0.05) multiple comparisons test, within the two-way ANOVA test (P = 0.05).

**Supplementary Table S10. Percentage of swelling index (idxSWL (%)) from microspheres**

The results belong to the P6\*pH\*Time interaction factor levels

| Time      | P6_pH1.2             | P6_pH3                  | P6_pH5                  | P6_pH6.8              | P6_pH7.4              |
|-----------|----------------------|-------------------------|-------------------------|-----------------------|-----------------------|
| <b>1h</b> | 379.303if<br>±0.202  | 407.220ie<br>±1.874     | 649.597hw<br>±0.225     | 2481.540fp<br>±0.185  | 3747.473em<br>±0.371  |
| <b>2h</b> | 678.393hv<br>±0.462  | 854.020hp<br>±0.673     | 2057.203gb gc<br>±0.248 | 4867.977ea<br>±0.543  | 6987.917de<br>±0.636  |
| <b>3h</b> | 928.083hm<br>±0.160  | 1281.093hc<br>±0.103    | 3396.293er<br>±0.272    | 6724.627dg<br>±0.702  | 9417.887bs<br>±0.605  |
| <b>4h</b> | 1174.967hf<br>±0.158 | 1677.577gp gq<br>±0.681 | 4693.370ed<br>±0.957    | 8382.453ch<br>±0.275  | 11289.077ax<br>±0.362 |
| <b>5h</b> | 1360.163gz<br>±0.335 | 2048.117gb gc<br>±0.706 | 5756.450ds<br>±1.019    | 9593.530bq<br>±0.929  | 12265.020ak<br>±0.531 |
| <b>6h</b> | 1454.693gx<br>±0.678 | 2384.230fs<br>±0.520    | 6652.060dh<br>±0.931    | 10434.770bi<br>±0.518 | 12934.150aa<br>±5.181 |
| <b>7h</b> | 1521.520gu<br>±0.215 | 2588.487fn<br>±0.376    | 7145.203da<br>±1.778    | 10886.183bc<br>±1.025 | 13474.850v<br>±1.343  |
| <b>8h</b> | 1548.223gt<br>±0.224 | 2723.563fh<br>±0.314    | 7262.257cy<br>±0.545    | 11044.960az<br>±1.075 | 13734.510r<br>±1.117  |

Note: Different group letters that follow the means prescribe statistically significant means. Results were calculated with *post-hoc* Duncan (P = 0.05) multiple comparisons test, within the two-way ANOVA test (P = 0.05).

**Supplementary Table S11. Percentage of swelling index (idxSWL (%)) from microspheres**

The results belong to the P7\*pH\*Time interaction factor levels

| Time (h) | P7_pH1.2             | P7_pH3               | P7_pH5                 | P7_pH6.8              | P7_pH7.4              |
|----------|----------------------|----------------------|------------------------|-----------------------|-----------------------|
| 1        | 308.770ig<br>±0.387  | 387.670if<br>±0.653  | 626.213hy hz<br>±0.284 | 2094.073ga<br>±0.737  | 3533.300eq<br>±0.256  |
| 2        | 596.240ia<br>±0.159  | 802.433hq<br>±0.403  | 1901.897gh<br>±0.285   | 4445.310eg<br>±0.675  | 6546.773dj<br>±0.543  |
| 3        | 853.373hp<br>±0.119  | 1205.470he<br>±0.343 | 3237.780ev<br>±0.455   | 6485.967dk<br>±0.392  | 9275.717bu<br>±0.586  |
| 4        | 1041.837hj<br>±0.413 | 1612.200gr<br>±0.255 | 4394.020eh<br>±0.725   | 7994.533cm<br>±1.052  | 11052.050az<br>±1.378 |
| 5        | 1166.590hf<br>±0.273 | 2004.283ge<br>±0.556 | 5301.637dw<br>±0.349   | 9049.467bx<br>±1.014  | 12155.257am<br>±0.907 |
| 6        | 1248.843hd<br>±0.440 | 2346.220ft<br>±0.236 | 5990.780dq<br>±1.082   | 9828.100bo<br>±0.744  | 12786.843ac<br>±0.192 |
| 7        | 1297.750hb<br>±0.385 | 2561.877fo<br>±0.419 | 6428.593dl<br>±1.169   | 10198.543bl<br>±0.740 | 13347.203y<br>±1.054  |
| 8        | 1323.147ha<br>±1.537 | 2606.533fm<br>±0.111 | 6616.847di<br>±0.661   | 10260.023bk<br>±1.305 | 13632.090t<br>±1.579  |

Note: Different group letters that follow the means prescribe statistically significant means. Results were calculated with *post-hoc* Duncan (P = 0.05) multiple comparisons test, within the two-way ANOVA test (P = 0.05).

**Supplementary Table S12. Percentage of swelling index (idxSWL (%)) from microspheres**

The results belong to the P8\*pH\*Time interaction factor levels

| Time (h) | P8_pH1.2                | P8_pH3                  | P8_pH5               | P8_pH6.8              | P8_pH7.4               |
|----------|-------------------------|-------------------------|----------------------|-----------------------|------------------------|
| 1        | 410.690ie<br>±0.608     | 449.950ic<br>±0.338     | 802.647hq<br>±0.329  | 2720.317fh<br>±0.620  | 4079.207ek<br>±0.251   |
| 2        | 769.073hs<br>±0.307     | 993.303hk<br>±0.414     | 2293.713fu<br>±0.574 | 5441.483dv<br>±0.913  | 7382.173cx<br>±0.739   |
| 3        | 1095.507hh<br>±0.260    | 1498.203gv<br>±0.833    | 3753.277em<br>±0.175 | 7640.420cq<br>±0.848  | 9914.377bn<br>±0.651   |
| 4        | 1376.493gy<br>±0.368    | 1892.430gh<br>±0.245    | 5010.570dy<br>±0.896 | 9325.203bt<br>±1.426  | 11656.660as<br>±0.436  |
| 5        | 1612.373gr<br>±0.539    | 2279.257fv fw<br>±0.691 | 6082.457do<br>±0.564 | 10318.707bj<br>±1.146 | 12856.863ab<br>±47.953 |
| 6        | 1796.710gm gn<br>±0.559 | 2591.740fn<br>±4.789    | 7013.023dd<br>±1.283 | 10949.133bb<br>±1.019 | 13673.733s<br>±0.344   |
| 7        | 1894.040gh<br>±0.400    | 2803.477fg<br>±0.713    | 7655.807cp<br>±1.248 | 11393.470av<br>±0.956 | 14354.557o<br>±0.445   |
| 8        | 1972.503gf<br>±0.478    | 2975.593fc<br>±0.721    | 8091.447ck<br>±0.871 | 11587.580at<br>±1.675 | 14579.537m<br>±0.847   |

Note: Different group letters that follow the means prescribe statistically significant means. Results were calculated with *post-hoc* Duncan (P = 0.05) multiple comparisons test, within the two-way ANOVA test (P = 0.05).

**Supplementary Table S13. Percentage of QUE released (mQrel (%)) from microspheres**

The results belong to the Sample\*Time interaction factor levels

| Time (h) | P1                 | P2                 | P3                 | P5                 | P6                 | P7                 | QUE                |
|----------|--------------------|--------------------|--------------------|--------------------|--------------------|--------------------|--------------------|
| 0.25     | 0.150bh<br>±0.008  | 0.290bh<br>±0.014  | 0.387bh<br>±0.013  | 0.120bh<br>±0.008  | 0.117bh<br>±0.013  | 0.130bh<br>±0.008  | 1.820bg<br>±0.269  |
| 0.5      | 11.187bc<br>±0.017 | 14.473bb<br>±0.005 | 15.067ba<br>±0.033 | 6.963bf<br>±0.029  | 7.480be<br>±0.008  | 8.187bd<br>±0.013  | 24.467av<br>±0.314 |
| 0.75     | 22.460aw<br>±0.028 | 26.347at<br>±0.021 | 28.780ar<br>±0.025 | 16.377az<br>±0.013 | 17.853ay<br>±0.029 | 18.937ax<br>±0.033 | 41.477am<br>±0.338 |
| 1        | 35.143ap<br>±0.009 | 38.053ao<br>±0.017 | 42.090al<br>±0.008 | 25.177au<br>±0.033 | 28.167as<br>±0.013 | 30.353aq<br>±0.029 | 55.440ae<br>±0.385 |
| 2        | 59.517ai<br>±0.033 | 63.357ag<br>±0.042 | 67.810af<br>±0.008 | 44.717ap<br>±0.013 | 49.573an<br>±0.029 | 56.087ak<br>±0.013 | 76.073y<br>±0.707  |
| 3        | 77.850ac<br>±0.022 | 81.843aa<br>±0.021 | 85.193x<br>±0.021  | 64.687aj<br>±0.013 | 69.277ah<br>±0.042 | 74.643ad<br>±0.029 | 89.107t<br>±0.522  |
| 4        | 85.103w<br>±0.034  | 87.917u<br>±0.017  | 90.227r<br>±0.017  | 71.547ae<br>±0.033 | 76.270ab<br>±0.008 | 80.347y<br>±0.042  | 96.217n<br>±0.682  |
| 5        | 90.337rs<br>±0.013 | 92.417o<br>±0.039  | 94.917l<br>±0.033  | 77.540z<br>±0.008  | 80.783w<br>±0.029  | 85.140u<br>±0.008  | 97.320h<br>±0.650  |
| 6        | 92.830l<br>±0.008  | 94.347j<br>±0.009  | 96.483g<br>±0.021  | 81.777v<br>±0.013  | 84.907t<br>±0.013  | 88.443q<br>±0.029  | 97.337b<br>±0.725  |
| 8        | 96.143g<br>±0.009  | 96.140e<br>±0.008  | 97.733c<br>±0.021  | 84.597s<br>±0.013  | 87.377p<br>±0.013  | 90.913l<br>±0.029  | 97.347a<br>±0.723  |
| 12       | 47.273e<br>±0.041  | 51.097d<br>±0.031  | 54.307b<br>±0.013  | 35.120o<br>±0.008  | 38.850lm<br>±0.008 | 43.377i<br>±0.033  | 66.847a<br>±0.473  |
| 24       | 69.647b<br>±0.009  | 74.387b<br>±0.009  | 78.017a<br>±0.039  | 55.133m<br>±0.029  | 60.357k<br>±0.033  | 66.450f<br>±0.008  | 84.050a<br>±0.611  |

Note: Different letters that follow the means prescribe statistically significant means. Results were calculated with *post-hoc* Duncan (P = 0.05) multiple comparisons test, within the two-way ANOVA test (P = 0.05).

**Supplementary Table S14. Percentage of QUE released (mQUErel (%)) from microsphere**

The results belong to the Time interaction factor levels

| Time<br>(h) | mQUErel_t (%)  |
|-------------|----------------|
| 0.25        | 0.430l ±0.584  |
| 0.5         | 12.546k ±5.732 |
| 0.75        | 24.604j ±8.065 |
| 1           | 36.346i ±9.484 |
| 2           | 48.124h ±9.829 |
| 3           | 59.590g ±9.912 |
| 4           | 69.720f ±9.316 |
| 5           | 77.514e ±8.046 |
| 6           | 83.947d ±7.867 |
| 8           | 88.350c ±6.855 |
| 12          | 90.875b ±5.528 |
| 24          | 92.893a ±4.900 |

Note: Different letters that follow the means prescribe statistically significant means. Results were calculated with *post-hoc* Duncan (P = 0.05) multiple comparisons test, within the two-way ANOVA test (P = 0.05).



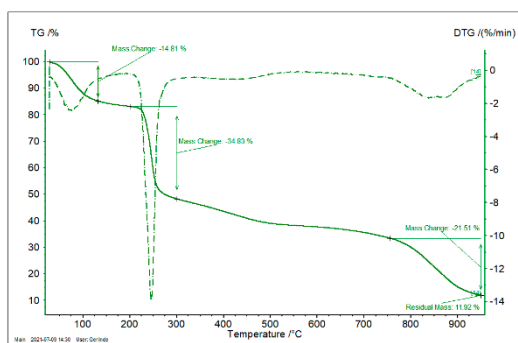

a

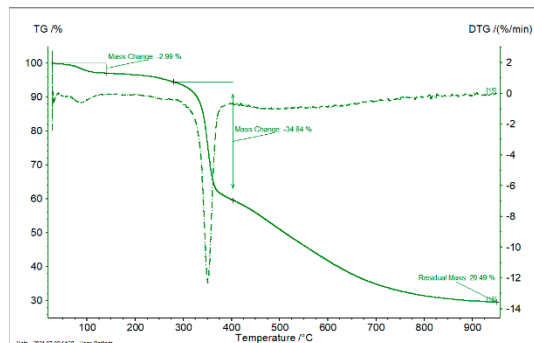

b

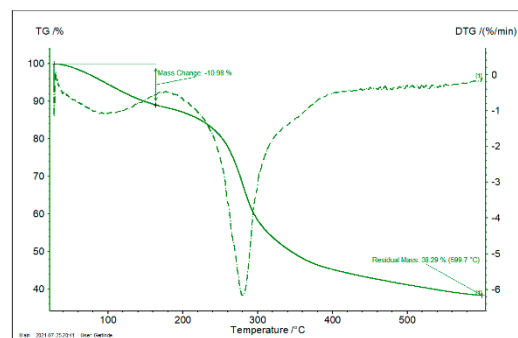

c

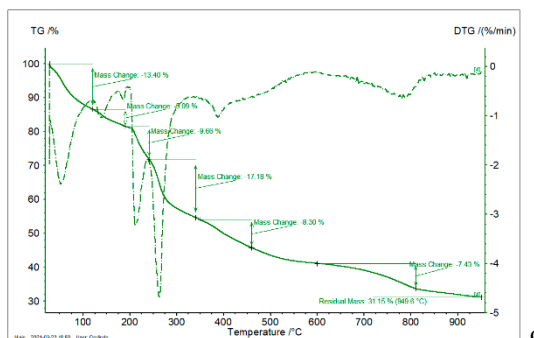

d

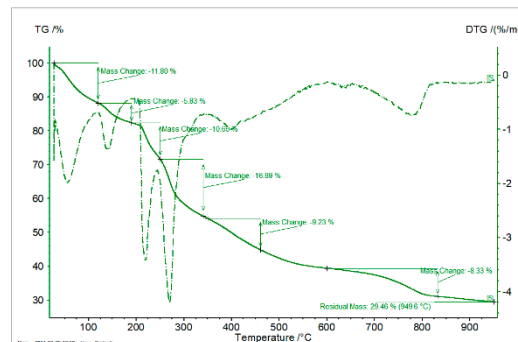

e

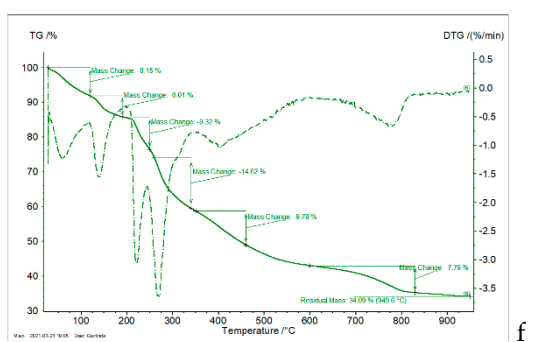

f

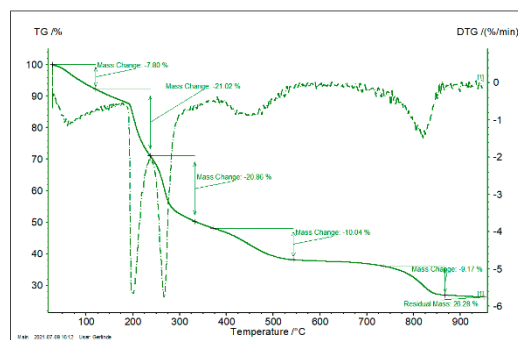

g

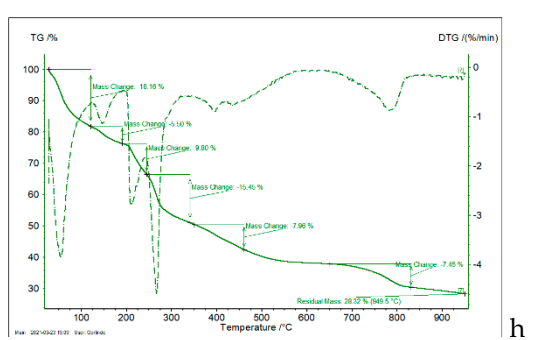

h

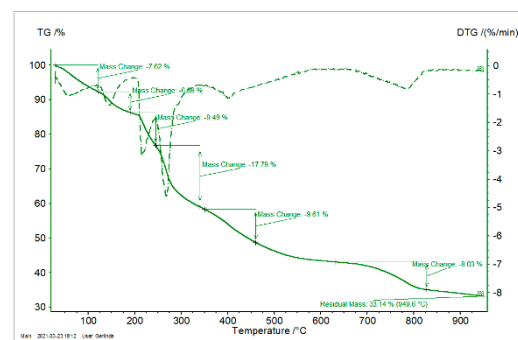

i

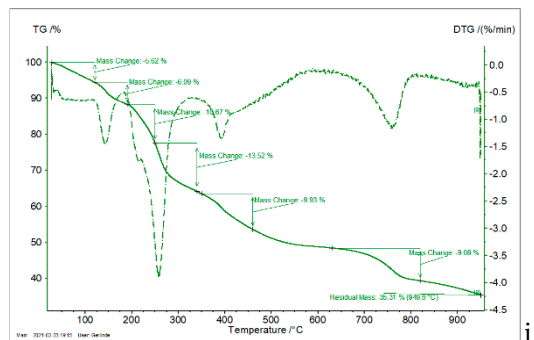

j

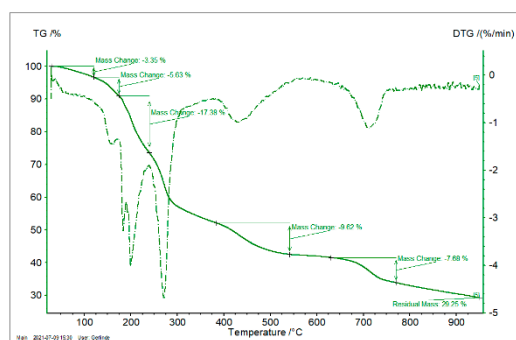

**Supplementary Figure S2.** TG and DTG for: a - Na-Alg, b - QUE, c - Ch, d - P1, e - P2, f - P3, g - P4, h - P5, i - P6, j - P7, k - P8.

k

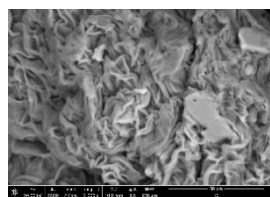**P1**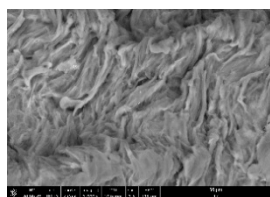**P2**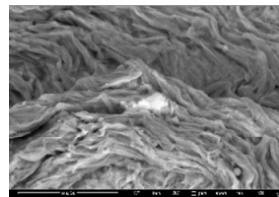**P3**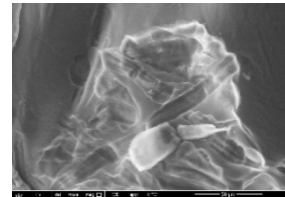**P4**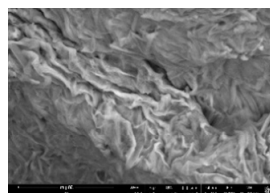**P5**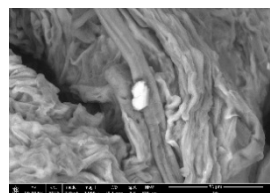**P6**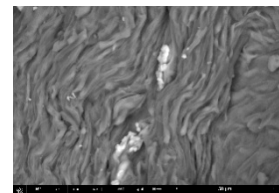**P7**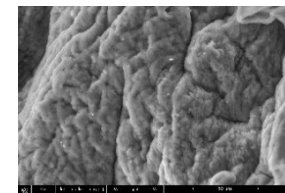**P8**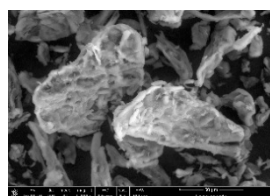**Sodium alginate**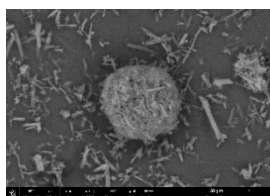**Quercetin**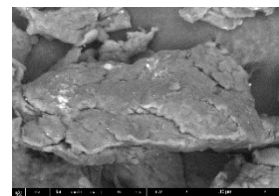**Chitosan**

**Supplementary Figure S3.** SEM analysis of quercetin micro-spheres.

**Supplementary Table S15. Results of the non-linear regression of the idxSWL (%) time series for sample P1 and all pH factor levels**

| <b>P1</b>                       | <b>pH 1.2</b>    | <b>pH 3</b>      | <b>pH 5</b>       | <b>pH 6.8</b>    | <b>pH 7.4</b>    |
|---------------------------------|------------------|------------------|-------------------|------------------|------------------|
| <b>Best-fit values</b>          |                  |                  |                   |                  |                  |
| <b>Ymax</b>                     | 2504             | 4322             | 14554             | 13546            | 17490            |
| <b>K</b>                        | 0.2281           | 0.1872           | 0.1332            | 0.3863           | 0.3629           |
| <b>HalfLife</b>                 | 3.039            | 3.704            | 5.203             | 1.794            | 1.910            |
| <b>Std. Error</b>               |                  |                  |                   |                  |                  |
| <b>Ymax</b>                     | 55.18            | 113.3            | 1342              | 201.3            | 185.0            |
| <b>K</b>                        | 0.009860         | 0.008634         | 0.01854           | 0.01598          | 0.01022          |
| <b>95% Confidence Intervals</b> |                  |                  |                   |                  |                  |
| <b>Ymax</b>                     | 2390 to 2619     | 4087 to 4557     | 11770 to 17337    | 13129 to 13963   | 17106 to 17873   |
| <b>K</b>                        | 0.2076 to 0.2485 | 0.1692 to 0.2051 | 0.09477 to 0.1717 | 0.3532 to 0.4195 | 0.3417 to 0.3841 |
| <b>HalfLife</b>                 | 2.789 to 3.338   | 3.380 to 4.096   | 4.038 to 7.314    | 1.652 to 1.963   | 1.804 to 2.028   |
| <b>Goodness of Fit</b>          |                  |                  |                   |                  |                  |
| <b>Degrees of Freedom</b>       | 22               | 22               | 22                | 22               | 22               |
| <b>R square</b>                 | 0.9940           | 0.9952           | 0.9792            | 0.9873           | 0.9944           |
| <b>Adjusted R square</b>        | 0.9937           | 0.9950           | 0.9783            | 0.9867           | 0.9941           |

**Supplementary Table S16. Results of the non-linear regression of the idxSWL (%) time series for sample P2 and all pH factor levels**

| <b>P2</b>                       | <b>pH 1.2</b>       | <b>pH 3</b>         | <b>pH 5</b>          | <b>pH 6.8</b>       | <b>pH 7.4</b>       |
|---------------------------------|---------------------|---------------------|----------------------|---------------------|---------------------|
| <b>Best-fit values</b>          |                     |                     |                      |                     |                     |
| <b>Ymax</b>                     | 2583                | 4036                | 13517                | 13813               | 17603               |
| <b>K</b>                        | 0.2036              | 0.2017              | 0.1395               | 0.3239              | 0.3136              |
| <b>HalfLife</b>                 | 3.405               | 3.437               | 4.969                | 2.140               | 2.211               |
| <b>Std. Error</b>               |                     |                     |                      |                     |                     |
| <b>Ymax</b>                     | 60.68               | 90.59               | 1318                 | 272.3               | 200.0               |
| <b>K</b>                        | 0.008796            | 0.008283            | 0.02091              | 0.01569             | 0.008563            |
| <b>95% Confidence Intervals</b> |                     |                     |                      |                     |                     |
| <b>Ymax</b>                     | 2457 to 2709        | 3848 to 4224        | 10784 to 16251       | 13248 to 14378      | 17188 to 18017      |
| <b>K</b>                        | 0.1853 to<br>0.2218 | 0.1845 to<br>0.2188 | 0.09614 to<br>0.1829 | 0.2913 to<br>0.3564 | 0.2958 to<br>0.3313 |
| <b>HalfLife</b>                 | 3.125 to 3.740      | 3.167 to 3.757      | 3.791 to 7.210       | 1.945 to 2.379      | 2.092 to 2.343      |
| <b>Goodness of Fit</b>          |                     |                     |                      |                     |                     |
| <b>Degrees of Freedom</b>       | 22                  | 22                  | 22                   | 22                  | 22                  |
| <b>R square</b>                 | 0.9951              | 0.9957              | 0.9744               | 0.9867              | 0.9957              |
| <b>Adjusted R square</b>        | 0.9949              | 0.9955              | 0.9733               | 0.9861              | 0.9955              |

**Supplementary Table S17. Results of the non-linear regression of the idxSWL (%) time series for sample P3 and all pH factor levels**

| P3                              | pH 1.2              | pH 3                | pH 5                 | pH 6.8              | pH 7.4              |
|---------------------------------|---------------------|---------------------|----------------------|---------------------|---------------------|
| <b>Best-fit values</b>          |                     |                     |                      |                     |                     |
| <b>Ymax</b>                     | 2655                | 3819                | 13490                | 13406               | 16322               |
| <b>K</b>                        | 0.1886              | 0.2036              | 0.1261               | 0.2977              | 0.3300              |
| <b>HalfLife</b>                 | 3.675               | 3.404               | 5.495                | 2.328               | 2.100               |
| <b>Std. Error</b>               |                     |                     |                      |                     |                     |
| <b>Ymax</b>                     | 74.87               | 63.60               | 1652                 | 152.5               | 216.8               |
| <b>K</b>                        | 0.009393            | 0.006237            | 0.02283              | 0.007861            | 0.01092             |
| <b>95% Confidence Intervals</b> |                     |                     |                      |                     |                     |
| <b>Ymax</b>                     | 2499 to 2810        | 3687 to 3951        | 10064 to 16917       | 13090 to 13723      | 15873 to 16772      |
| <b>K</b>                        | 0.1691 to<br>0.2081 | 0.1907 to<br>0.2165 | 0.07880 to<br>0.1735 | 0.2814 to<br>0.3140 | 0.3074 to<br>0.3527 |
| <b>HalfLife</b>                 | 3.331 to 4.099      | 3.201 to 3.635      | 3.995 to 8.796       | 2.207 to 2.463      | 1.966 to 2.255      |
| <b>Goodness of Fit</b>          |                     |                     |                      |                     |                     |
| <b>Degrees of Freedom</b>       | 22                  | 22                  | 22                   | 22                  | 22                  |
| <b>R square</b>                 | 0.9943              | 0.9975              | 0.9698               | 0.9964              | 0.9933              |
| <b>Adjusted R square</b>        | 0.9941              | 0.9974              | 0.9684               | 0.9962              | 0.9930              |

**Supplementary Table S18. Results of the non-linear regression of the idxSWL (%) time series for sample P4 and all pH factor levels**

| P4                              | pH 1.2              | pH 3                | pH 5                | pH 6.8              | pH 7.4              |
|---------------------------------|---------------------|---------------------|---------------------|---------------------|---------------------|
| <b>Best-fit values</b>          |                     |                     |                     |                     |                     |
| <b>Ymax</b>                     | 2647                | 4070                | 12183               | 14486               | 17862               |
| <b>K</b>                        | 0.2204              | 0.2297              | 0.1978              | 0.3644              | 0.3750              |
| <b>HalfLife</b>                 | 3.146               | 3.018               | 3.504               | 1.902               | 1.848               |
| <b>Std. Error</b>               |                     |                     |                     |                     |                     |
| <b>Ymax</b>                     | 60.33               | 100.1               | 853.0               | 199.4               | 207.8               |
| <b>K</b>                        | 0.009658            | 0.01112             | 0.02509             | 0.01339             | 0.01190             |
| <b>95% Confidence Intervals</b> |                     |                     |                     |                     |                     |
| <b>Ymax</b>                     | 2521 to 2772        | 3862 to 4277        | 10413 to 13952      | 14072 to 14899      | 17431 to 18293      |
| <b>K</b>                        | 0.2003 to<br>0.2404 | 0.2066 to<br>0.2527 | 0.1458 to<br>0.2499 | 0.3366 to<br>0.3922 | 0.3504 to<br>0.3997 |
| <b>HalfLife</b>                 | 2.883 to 3.460      | 2.743 to 3.355      | 2.774 to 4.754      | 1.767 to 2.059      | 1.734 to 1.978      |
| <b>Goodness of Fit</b>          |                     |                     |                     |                     |                     |
| <b>Degrees of Freedom</b>       | 22                  | 22                  | 22                  | 22                  | 22                  |
| <b>R square</b>                 | 0.9942              | 0.9925              | 0.9657              | 0.9907              | 0.9926              |
| <b>Adjusted R square</b>        | 0.9939              | 0.9922              | 0.9641              | 0.9902              | 0.9923              |

**Supplementary Table S19. Results of the non-linear regression of the idxSWL (%) time series for sample P5 and all pH factor levels**

| P5                              | pH 1.2              | pH 3                 | pH 5                 | pH 6.8              | pH 7.4              |
|---------------------------------|---------------------|----------------------|----------------------|---------------------|---------------------|
| <b>Best-fit values</b>          |                     |                      |                      |                     |                     |
| <b>Ymax</b>                     | 2304                | 5592                 | 15307                | 12887               | 15957               |
| <b>K</b>                        | 0.2140              | 0.09050              | 0.09334              | 0.2809              | 0.3068              |
| <b>HalfLife</b>                 | 3.239               | 7.659                | 7.426                | 2.467               | 2.259               |
| <b>Std. Error</b>               |                     |                      |                      |                     |                     |
| <b>Ymax</b>                     | 81.97               | 378.7                | 2502                 | 281.7               | 160.0               |
| <b>K</b>                        | 0.01440             | 0.008136             | 0.02043              | 0.01372             | 0.007288            |
| <b>95% Confidence Intervals</b> |                     |                      |                      |                     |                     |
| <b>Ymax</b>                     | 2134 to 2474        | 4806 to 6377         | 10119 to 20495       | 12303 to 13471      | 15625 to 16289      |
| <b>K</b>                        | 0.1842 to<br>0.2439 | 0.07362 to<br>0.1074 | 0.05098 to<br>0.1357 | 0.2525 to<br>0.3094 | 0.2917 to<br>0.3219 |
| <b>HalfLife</b>                 | 2.842 to 3.764      | 6.456 to 9.415       | 5.108 to 13.60       | 2.240 to 2.745      | 2.153 to 2.376      |
| <b>Goodness of Fit</b>          |                     |                      |                      |                     |                     |
| <b>Degrees of Freedom</b>       | 22                  | 22                   | 22                   | 22                  | 22                  |
| <b>R square</b>                 | 0.9874              | 0.9955               | 0.9749               | 0.9894              | 0.9969              |
| <b>Adjusted R square</b>        | 0.9869              | 0.9953               | 0.9738               | 0.9889              | 0.9968              |



**Supplementary Table S20. Results of the non-linear regression of the idxSWL (%) time series for sample P6 and all pH factor levels**

| P6                              | pH 1.2              | pH 3                 | pH 5                 | pH 6.8              | pH 7.4              |
|---------------------------------|---------------------|----------------------|----------------------|---------------------|---------------------|
| <b>Best-fit values</b>          |                     |                      |                      |                     |                     |
| <b>Ymax</b>                     | 1874                | 5275                 | 15774                | 13464               | 15122               |
| <b>K</b>                        | 0.2387              | 0.09519              | 0.08428              | 0.2353              | 0.3211              |
| <b>HalfLife</b>                 | 2.904               | 7.281                | 8.224                | 2.946               | 2.158               |
| <b>Std. Error</b>               |                     |                      |                      |                     |                     |
| <b>Ymax</b>                     | 40.97               | 381.6                | 2977                 | 304.3               | 175.4               |
| <b>K</b>                        | 0.01051             | 0.009273             | 0.02072              | 0.01063             | 0.009104            |
| <b>95% Confidence Intervals</b> |                     |                      |                      |                     |                     |
| <b>Ymax</b>                     | 1789 to 1959        | 4483 to 6066         | 9599 to 21950        | 12833 to 14095      | 14758 to 15485      |
| <b>K</b>                        | 0.2169 to<br>0.2605 | 0.07596 to<br>0.1144 | 0.04131 to<br>0.1273 | 0.2133 to<br>0.2573 | 0.3023 to<br>0.3400 |
| <b>HalfLife</b>                 | 2.661 to 3.196      | 6.058 to 9.125       | 5.447 to 16.78       | 2.694 to 3.250      | 2.039 to 2.293      |
| <b>Goodness of Fit</b>          |                     |                      |                      |                     |                     |
| <b>Degrees of Freedom</b>       | 22                  | 22                   | 22                   | 22                  | 22                  |
| <b>R square</b>                 | 0.9931              | 0.9943               | 0.9743               | 0.9931              | 0.9953              |
| <b>Adjusted R square</b>        | 0.9928              | 0.9940               | 0.9732               | 0.9928              | 0.9951              |

**Supplementary Table S21. Results of the non-linear regression of the idxSWL (%) time series for sample P7 and all pH factor levels**

| P7                              | pH 1.2              | pH 3                 | pH 5                 | pH 6.8              | pH 7.4              |
|---------------------------------|---------------------|----------------------|----------------------|---------------------|---------------------|
| <b>Best-fit values</b>          |                     |                      |                      |                     |                     |
| <b>Ymax</b>                     | 1552                | 5373                 | 12765                | 12579               | 15279               |
| <b>K</b>                        | 0.2622              | 0.08933              | 0.09905              | 0.2378              | 0.3009              |
| <b>HalfLife</b>                 | 2.644               | 7.759                | 6.998                | 2.914               | 2.303               |
| <b>Std. Error</b>               |                     |                      |                      |                     |                     |
| <b>Ymax</b>                     | 33.22               | 601.3                | 1932                 | 405.2               | 240.5               |
| <b>K</b>                        | 0.01199             | 0.01322              | 0.02043              | 0.01541             | 0.01107             |
| <b>95% Confidence Intervals</b> |                     |                      |                      |                     |                     |
| <b>Ymax</b>                     | 1483 to 1621        | 4126 to 6620         | 8758 to 16773        | 11738 to 13419      | 14781 to 15778      |
| <b>K</b>                        | 0.2373 to<br>0.2870 | 0.06191 to<br>0.1168 | 0.05669 to<br>0.1414 | 0.2059 to<br>0.2698 | 0.2780 to<br>0.3239 |
| <b>HalfLife</b>                 | 2.415 to 2.921      | 5.937 to 11.20       | 4.901 to 12.23       | 2.569 to 3.367      | 2.140 to 2.494      |
| <b>Goodness of Fit</b>          |                     |                      |                      |                     |                     |
| <b>Degrees of Freedom</b>       | 22                  | 22                   | 22                   | 22                  | 22                  |
| <b>R square</b>                 | 0.9916              | 0.9885               | 0.9752               | 0.9862              | 0.9930              |
| <b>Adjusted R square</b>        | 0.9912              | 0.9880               | 0.9740               | 0.9856              | 0.9927              |

**Supplementary Table S22. Results of the non-linear regression of the idxSWL (%) time series for sample P8 and all pH factor levels**

| P8                              | pH 1.2              | pH 3                | pH 5                 | pH 6.8              | pH 7.4              |
|---------------------------------|---------------------|---------------------|----------------------|---------------------|---------------------|
| <b>Best-fit values</b>          |                     |                     |                      |                     |                     |
| <b>Ymax</b>                     | 2622                | 4938                | 18164                | 13352               | 16089               |
| <b>K</b>                        | 0.1836              | 0.1197              | 0.07759              | 0.2786              | 0.3142              |
| <b>HalfLife</b>                 | 3.775               | 5.791               | 8.933                | 2.488               | 2.206               |
| <b>Std. Error</b>               |                     |                     |                      |                     |                     |
| <b>Ymax</b>                     | 61.55               | 239.8               | 2695                 | 279.0               | 117.4               |
| <b>K</b>                        | 0.007509            | 0.008425            | 0.01469              | 0.01293             | 0.005518            |
| <b>95% Confidence Intervals</b> |                     |                     |                      |                     |                     |
| <b>Ymax</b>                     | 2494 to 2750        | 4441 to 5435        | 12575 to 23752       | 12773 to 13930      | 15845 to 16332      |
| <b>K</b>                        | 0.1680 to<br>0.1992 | 0.1022 to<br>0.1372 | 0.04713 to<br>0.1081 | 0.2518 to<br>0.3054 | 0.3028 to<br>0.3257 |
| <b>HalfLife</b>                 | 3.480 to 4.125      | 5.053 to 6.781      | 6.415 to 14.71       | 2.270 to 2.753      | 2.128 to 2.289      |
| <b>Goodness of Fit</b>          |                     |                     |                      |                     |                     |
| <b>Degrees of Freedom</b>       | 22                  | 22                  | 22                   | 22                  | 22                  |
| <b>R square</b>                 | 0.9963              | 0.9953              | 0.9865               | 0.9905              | 0.9982              |
| <b>Adjusted R square</b>        | 0.9962              | 0.9951              | 0.9859               | 0.9900              | 0.9981              |

**Supplementary Table S23. Results of the non-linear regression of the QUE *in vitro* release time series for samples P1-P7 and QUE**

| <b>mQUErel (%)</b>              | <b>P1</b>           | <b>P2</b>           | <b>P3</b>           | <b>P5</b>           | <b>P6</b>           | <b>P7</b>           | <b>P1</b>           |
|---------------------------------|---------------------|---------------------|---------------------|---------------------|---------------------|---------------------|---------------------|
| <b>Best-fit values</b>          |                     |                     |                     |                     |                     |                     |                     |
| <b>Ymax</b>                     | 95.69               | 95.91               | 97.37               | 85.88               | 88.30               | 91.50               | 97.85               |
| <b>K</b>                        | 0.3412              | 0.3877              | 0.4217              | 0.2698              | 0.2967              | 0.3255              | 0.6390              |
| <b>HalfLife</b>                 | 2.032               | 1.788               | 1.644               | 2.569               | 2.336               | 2.130               | 1.085               |
| <b>Std. Error</b>               |                     |                     |                     |                     |                     |                     |                     |
| <b>Ymax</b>                     | 1.342               | 1.276               | 1.374               | 1.244               | 1.275               | 1.229               | 1.392               |
| <b>K</b>                        | 0.01356             | 0.01550             | 0.01857             | 0.009974            | 0.01140             | 0.01213             | 0.03356             |
| <b>95% Confidence Intervals</b> |                     |                     |                     |                     |                     |                     |                     |
| <b>Ymax</b>                     | 92.96 to<br>98.42   | 93.31 to<br>98.51   | 94.57 to<br>100.2   | 83.35 to<br>88.41   | 85.71 to<br>90.89   | 89.00 to<br>94.00   | 95.02 to<br>100.7   |
| <b>K</b>                        | 0.3136 to<br>0.3687 | 0.3562 to<br>0.4192 | 0.3839 to<br>0.4595 | 0.2495 to<br>0.2901 | 0.2735 to<br>0.3199 | 0.3008 to<br>0.3501 | 0.5708 to<br>0.7073 |
| <b>HalfLife</b>                 | 1.880 to<br>2.210   | 1.654 to<br>1.946   | 1.509 to<br>1.805   | 2.390 to<br>2.778   | 2.167 to<br>2.534   | 1.980 to<br>2.304   | 0.9800 to<br>1.214  |
| <b>Goodness of Fit</b>          |                     |                     |                     |                     |                     |                     |                     |
| <b>Degrees of Freedom</b>       | 34                  | 34                  | 34                  | 34                  | 34                  | 34                  | 34                  |
| <b>R square</b>                 | 0.9886              | 0.9880              | 0.9852              | 0.9906              | 0.9897              | 0.9903              | 0.9754              |
| <b>Adjusted R square</b>        | 0.9882              | 0.9877              | 0.9848              | 0.9903              | 0.9894              | 0.9901              | 0.9747              |

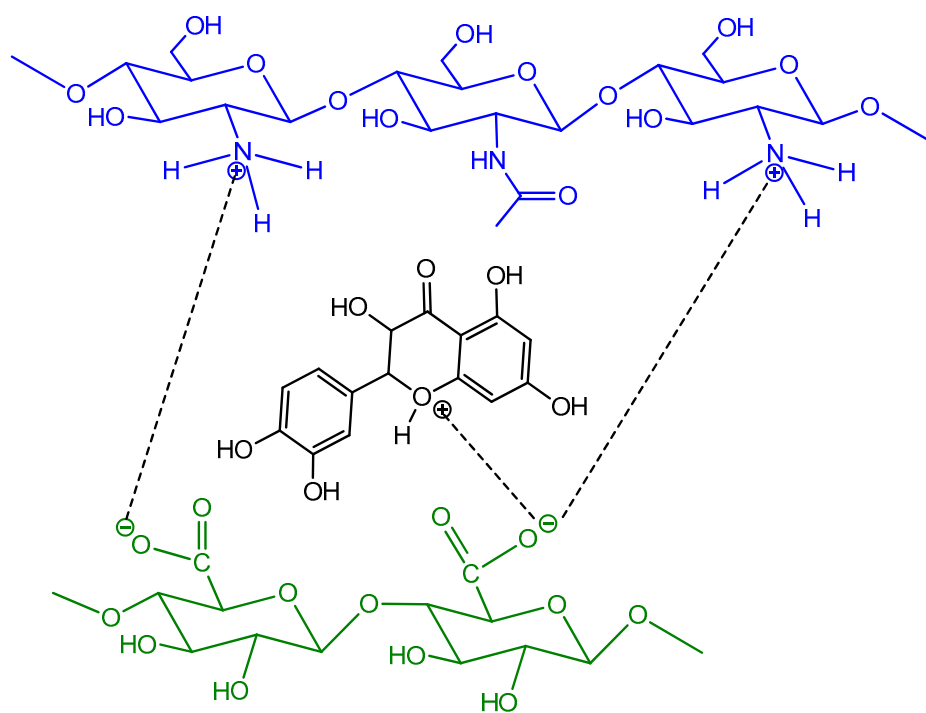

**Supplementary Figure S4** – Interactions established during microsphere formation and drug loading.

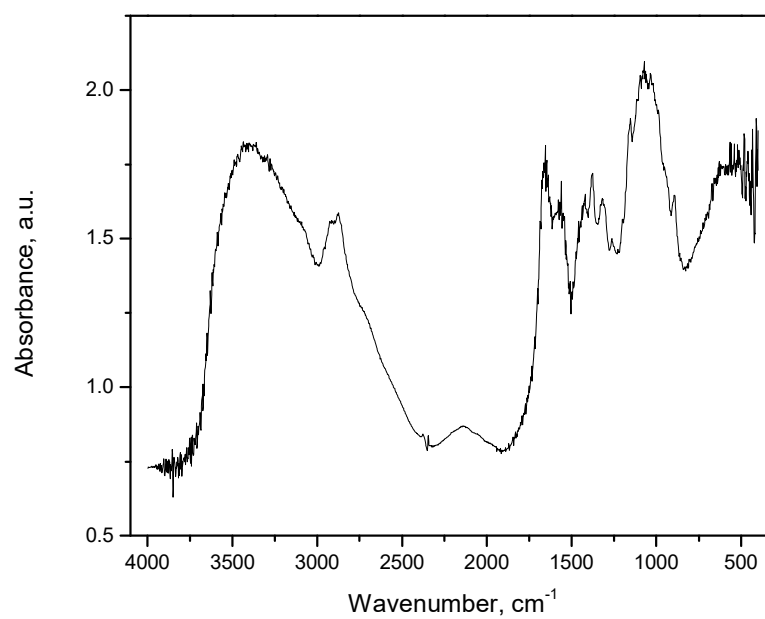

**Supplementary Figure S5** – Ch FT-IR spectra

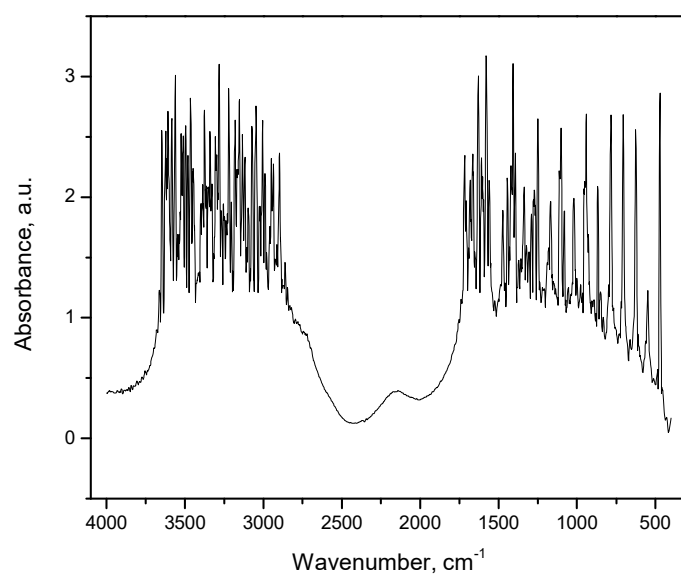

**Supplementary Figure S6** – Na-Alg FT-IR spectra

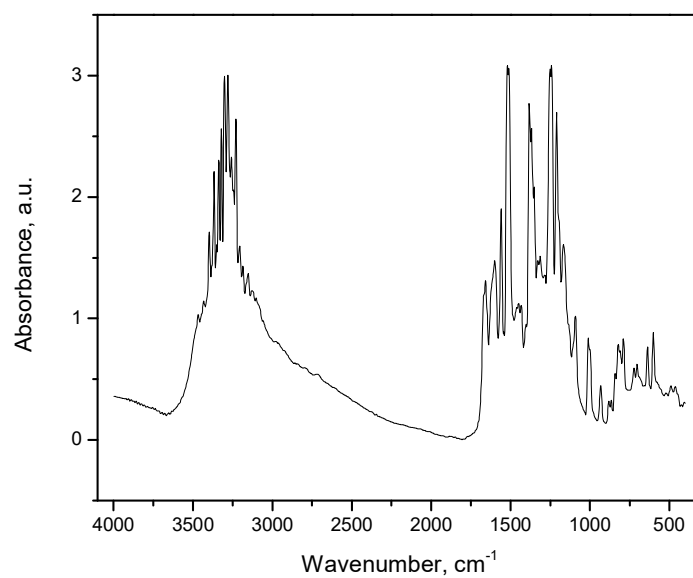

**Supplementary Figure S7** – QUE FT-IR spectra



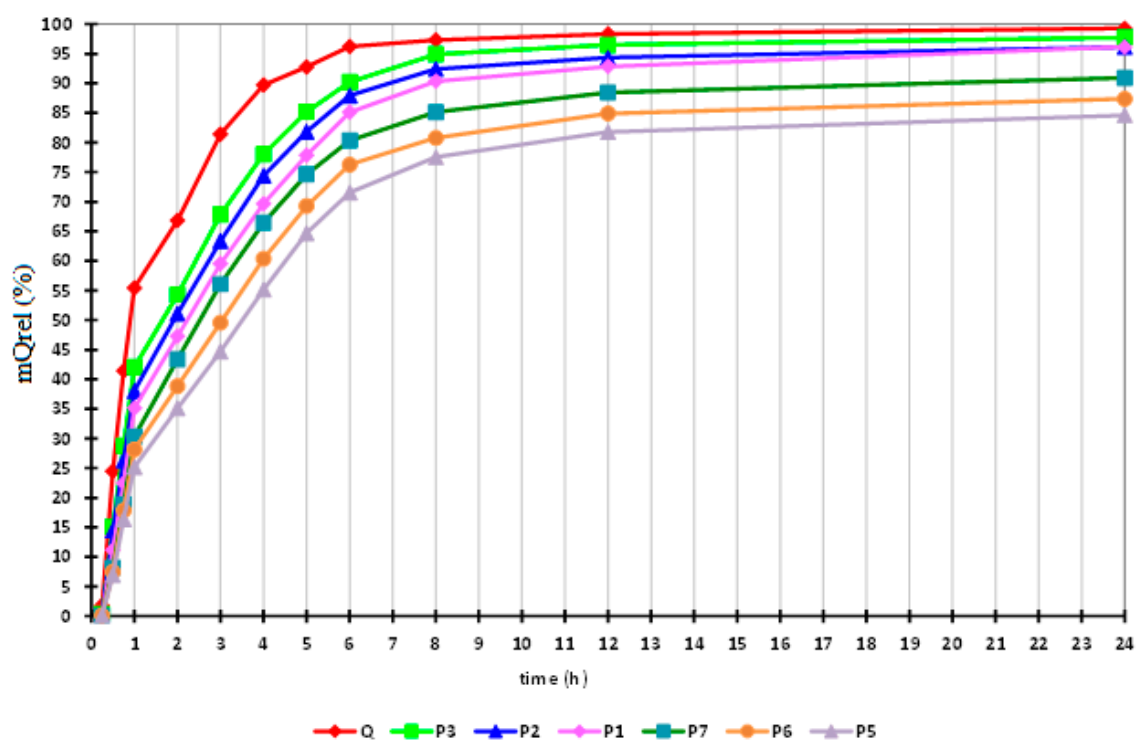

**Supplementary Figure S8** - Interval plots of the microspheres' percentage of Q released (mQrel (%)) from microspheres for Sample\*Time interaction factor levels
